# Supplementary material for: Neural Correlates of Advantageous and Disadvantageous Inequity in Sharing Decisions
Source: PubMed Central journal article supplement (PMC4169616; doi:10.1371/journal.pone.0107996), 2014-09-19
Supplement: pone.0107996.s001.pdf [file pone.0107996.s001.pdf]

**Table S1.** Regions of neural activation from the Inequity > Equity contrast per allocation game at the threshold of  $p < .005$  uncorrected, > 10 voxels.

| Anatomical region                                                            | L/R | Voxels | z    | MNI coordinates |     |    |
|------------------------------------------------------------------------------|-----|--------|------|-----------------|-----|----|
|                                                                              |     |        |      | x               | y   | z  |
| <b>Disadvantageous Prosocial Inequity condition: Inequity &gt; Equity</b>    |     |        |      |                 |     |    |
| Dorsolateral prefrontal cortex                                               | L   | 24     | 3.49 | -30             | 36  | 36 |
|                                                                              | R   | 28     | 3.47 | 27              | 42  | 36 |
| Lateral prefrontal cortex                                                    | R   | 10     | 2.94 | 45              | 39  | 18 |
| Ventromedial prefrontal cortex                                               | -   | 238    | 3.99 | 6               | 48  | 0  |
| Insula                                                                       | R   | 209    | 3.69 | 45              | 15  | -6 |
|                                                                              |     |        | 3.63 | 12              | 21  | 0  |
| Precuneus                                                                    | L   | 111    | 3.37 | -18             | -3  | -6 |
|                                                                              | L   | 33     | 3.53 | 6               | -42 | 45 |
|                                                                              | -   | 52     | 3.10 | -6              | -72 | 33 |
| Inferior frontal gyrus                                                       | L   | 15     | 3.46 | -54             | 15  | 18 |
|                                                                              | R   | 35     | 3.24 | 33              | 21  | 30 |
| Temporoparietal junction                                                     | R   | 36     | 3.29 | 48              | -36 | 45 |
|                                                                              | L   | 18     | 3.03 | -51             | -54 | 42 |
| Posterior temporal gyrus                                                     | L   | 20     | 3.44 | -57             | -51 | 0  |
| <b>Advantageous Self-maximizing Inequity condition: Inequity &gt; Equity</b> |     |        |      |                 |     |    |
| Pallidum                                                                     | R   | 34     | 3.46 | 24              | -6  | 3  |
| Ventrolateral prefrontal cortex                                              | R   | 24     | 3.06 | 36              | 45  | -3 |
| <b>Advantageous Competitive Inequity condition: Inequity &gt; Equity</b>     |     |        |      |                 |     |    |
| Dorsal anterior cingulate cortex                                             | -   | 49     | 3.39 | 9               | 39  | 21 |
| Somatosensory cortex                                                         | R   | 17     | 3.12 | 36              | -3  | 27 |

*Note.*  $p < .005$  uncorrected, > 10 voxels; L/R=Left/Right; k=cluster size in  $3 \times 3 \times 3$ mm voxels; Z=z-score; MNI coordinates =xyz voxel coordinates in MNI space of the peak voxel.
