# Supplementary material for: Neural Correlates of Advantageous and Disadvantageous Inequity in Sharing Decisions
Source: PubMed Central journal article supplement (PMC4169616; doi:10.1371/journal.pone.0107996), 2014-09-19
Supplement: pone.0107996.s002.pdf [file pone.0107996.s002.pdf]

**Table S2.** Regions of neural activation from whole-brain regression analyses with frequency of inequity choices per game as a regressor.

| Anatomical region                                            | L/R | Voxels | z    | MNI coordinates |     |    |
|--------------------------------------------------------------|-----|--------|------|-----------------|-----|----|
|                                                              |     |        |      | x               | y   | z  |
| <b>Positive correlation with frequency inequity choices</b>  |     |        |      |                 |     |    |
| <i>Advantageous Self-maximizing Inequity – null contrast</i> |     |        |      |                 |     |    |
| Posterior cingulate cortex                                   | -   | 17     | 3.71 | -3              | 27  | 36 |
| Dorsolateral prefrontal cortex                               | R   | 10     | 3.47 | 27              | 42  | 36 |
| <i>Advantageous Competitive Inequity – null contrast</i>     |     |        |      |                 |     |    |
| Cuneus                                                       | L   | 27     | 3.86 | 36              | 21  | 15 |
| <b>Negative correlation with frequency inequity choices</b>  |     |        |      |                 |     |    |
| <i>Advantageous Competitive Inequity – null contrast</i>     |     |        |      |                 |     |    |
| Cuneus                                                       | R   | 18     | 3.91 | 18              | -78 | 27 |
| Putamen                                                      | R   | 12     | 3.26 | 30              | 9   | 0  |

*Note.*  $p < .001$  uncorrected,  $> 10$  voxels; L/R=Left/Right; k=cluster size in  $3 \times 3 \times 3$ mm voxels; Z=z-score; MNI coordinates =xyz voxel coordinates in MNI space of the peak voxel.
